# Supplementary material for: A high carrier-mobility crystalline silicon film directly grown on polyimide using SiCl4/H2 microwave plasma for flexible thin film transistors
Source: Royal Society of Chemistry journal article supplement (doi:10.1039/c5tc01395j), 2015-01-01
Supplement: c5tc01395j1.pdf [file c5tc01395j1.pdf]

1 **High carrier-mobility crystalline silicon film directly grown on polyimide by**  
2 **SiCl<sub>4</sub>/H<sub>2</sub> microwave plasma for flexible thin film transistors**

3

4 Ping-Yen Hsieh, Chi-Young Lee and Nyan-Hwa Tai\*

5

6 Department of Materials Science and Engineering, National Tsing Hua University, No.

7 101, Section 2, Kuang-Fu Road, Hsinchu 30013, Taiwan, R.O.C.

8

9

10

11

12

13

14

15

16

17

18

19

20 \* Corresponding author: Nyan-Hwa Tai

21 Postal address: Department of Materials Science and Engineering, National Tsing Hua

22 University, No. 101, Section 2, Kuang-Fu Road, Hsinchu 30013, Taiwan, R.O.C.

23 Tel.: +866 3 5715131 #42568

24 Fax: + 886 3 5737406

25 E-mail address: nhtai@mx.nthu.edu.tw

## 1 Supporting information

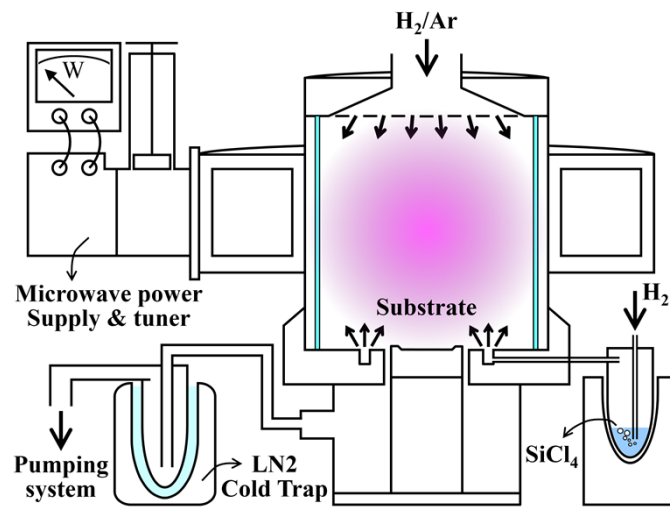

2

3 Fig. S1 Schematics of the MEPECVD system for the deposition of crystalline Si film.

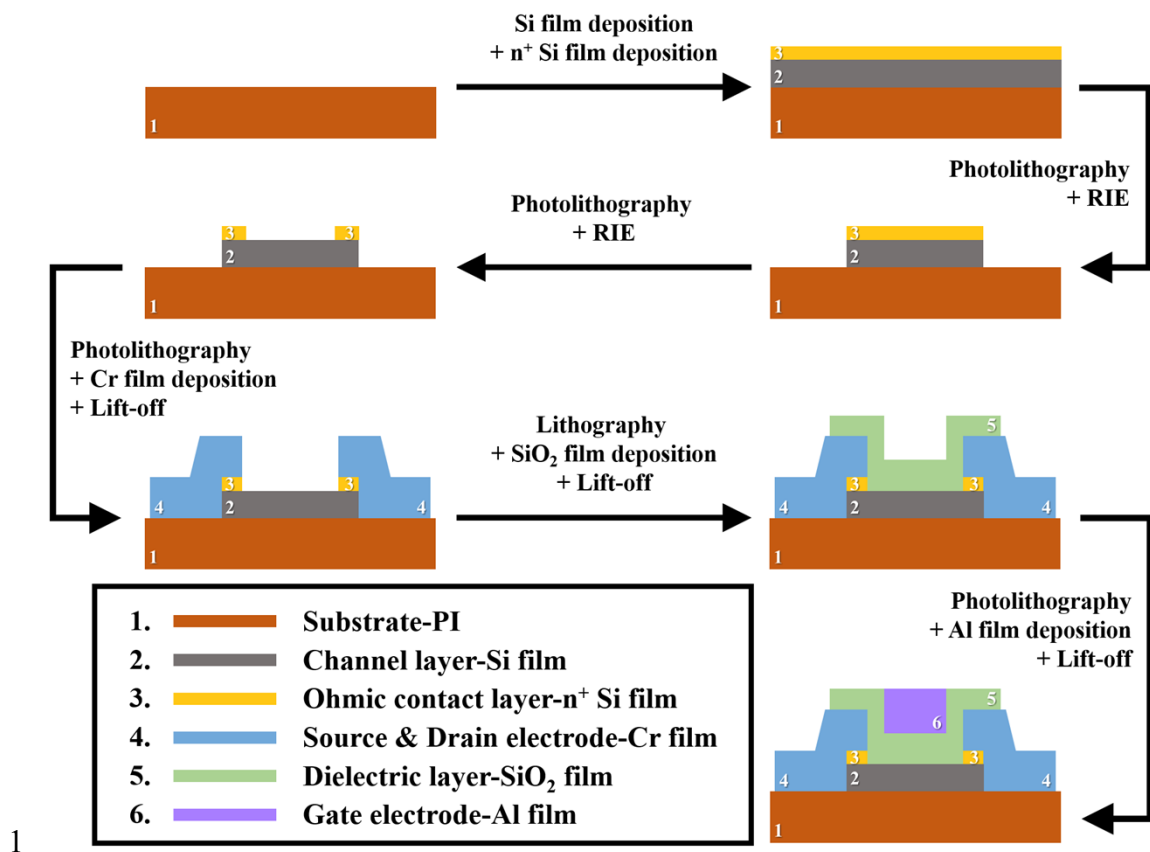

2 Fig. S2 Flowchart of the preparation processes for flexible Si-TFTs.

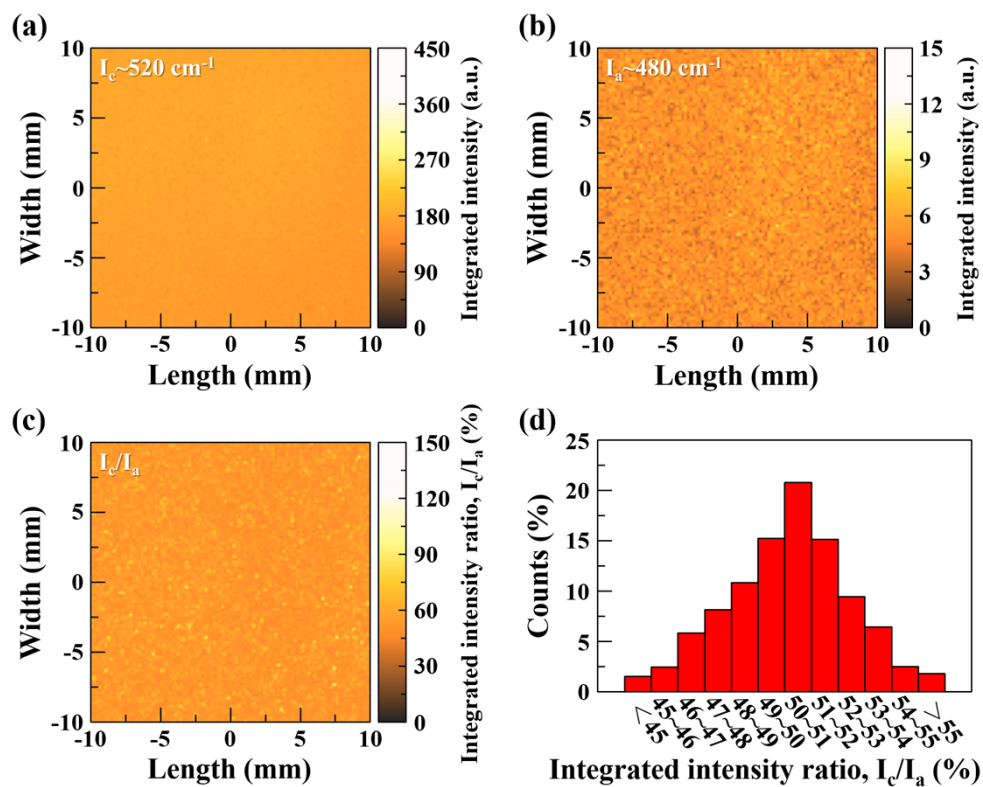

1

2 Fig. S3 Raman mapping of the prepared Si film under H<sub>2</sub> flow rate 100 sccm, (a)

3 integrated intensity map of crystalline phase near 520 cm<sup>-1</sup>, (b) integrated intensity map

4 of the amorphous phase at 480 cm<sup>-1</sup>, (c) integrated intensity ratio map of (a) and (b) ,

5 respectively; (d) Statistics of integrated intensity ratio from (c).

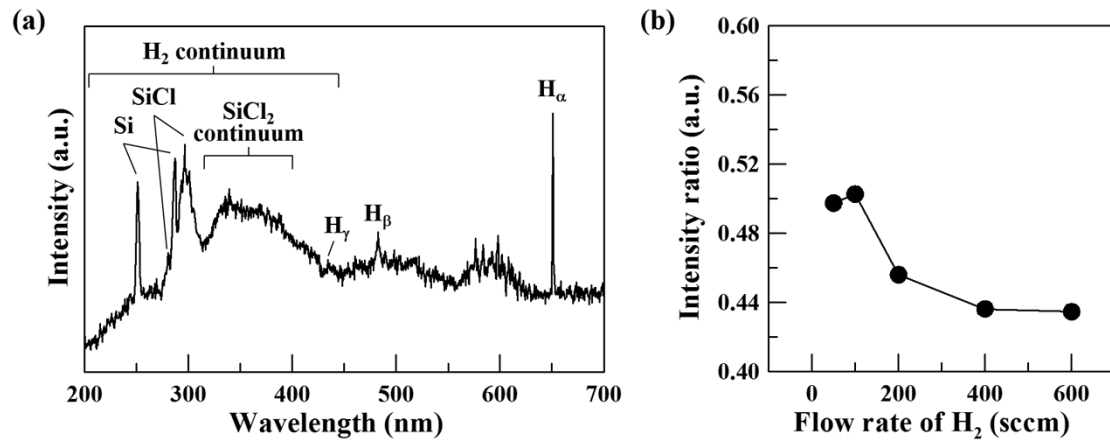

1

2 Fig. S4 (a) Typical OES spectrum from a glow discharge of a H<sub>2</sub>-diluted SiCl<sub>4</sub> mixture

3 in a MWPECVD system. (b) The OES intensity ratio of H<sub>β</sub>/H<sub>α</sub> versus H<sub>2</sub> flow rate.

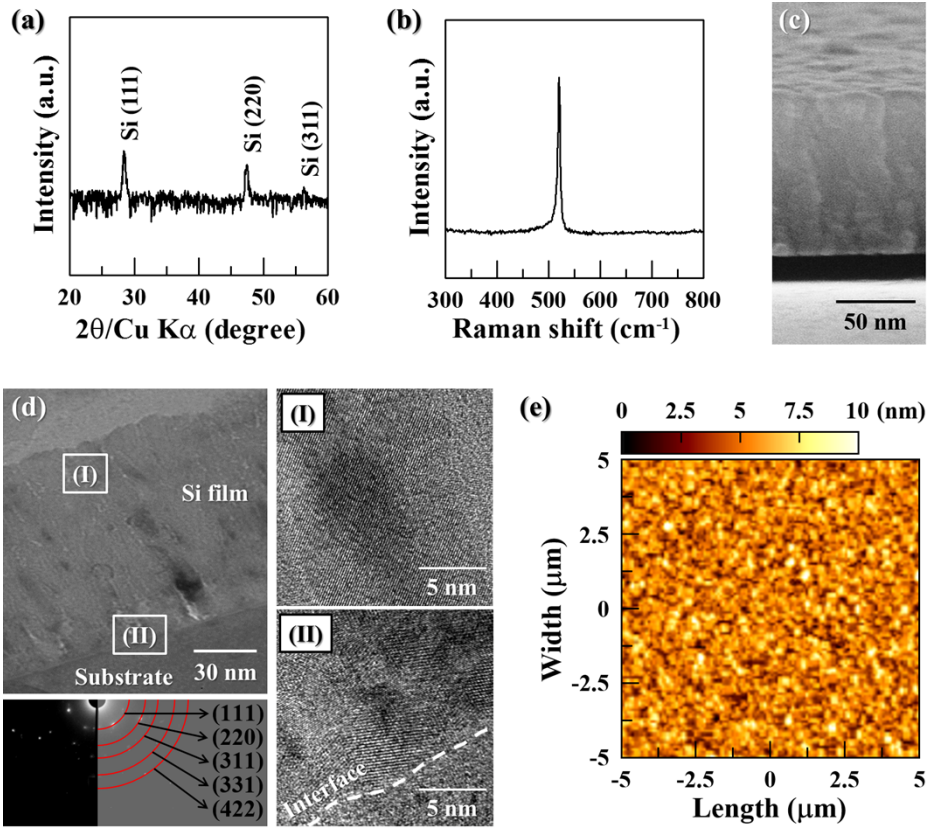

1

2 Fig. S5 (a) XRD pattern, (b) Raman spectrum, (c) FESEM cross-sectional morphology,  
 3 (d) cross-sectional BFI image with SAED pattern and corresponding HRTEM images  
 4 where images (I) and (II) represent the topmost and the bottom layers, respectively, and  
 5 (e) AFM surface topography of the Si channel layer prepared using optimal H<sub>2</sub> flow  
 6 rate of 100 sccm to fabricate the film with a thickness of 100 nm.

- 1 Table S1 The definition of the emission lines from OES spectrum of MW glow  
 2 discharge decomposition of H<sub>2</sub>-diluted SiCl<sub>4</sub>.

| Species           | Emission wavelength (nm) | Transition                                        |
|-------------------|--------------------------|---------------------------------------------------|
| Si                | 251.4                    | $4s^3P_1^0 \rightarrow 3p^2\ ^3P_0$               |
|                   | 288.2                    | $4s^3P_0^0 \rightarrow 3p^2\ ^1S_0$               |
| SiCl              | 280.9                    | $B^2\Delta \rightarrow X^2\Pi_r$                  |
|                   | 292.4                    | $B^2\Sigma^+ \rightarrow X^2\Pi_r$                |
| SiCl <sub>2</sub> | Continuum<br>310~400     | $\overset{9}{A}B_1 \rightarrow \overset{9}{X}A_1$ |
| H                 | 434.4 (H <sub>γ</sub> )  | $5d^2D \rightarrow 2p^2P^0$                       |
|                   | 486.1 (H <sub>β</sub> )  | $4d^2D \rightarrow 2p^2P^0$                       |
|                   | 656.3 (H <sub>α</sub> )  | $3d^2D \rightarrow 2p^2P^0$                       |
| H <sub>2</sub>    | Continuum<br>160~500     | $2s^3\Sigma_g \rightarrow 2p^3\Sigma_u$           |

3
